# Supplementary material for: Pivotal Roles for pH, Lactate, and Lactate-Utilizing Bacteria in the Stability of a Human Colonic Microbial Ecosystem
Source: PubMed Central journal article supplement (PMC7483512; doi:10.1128/msystems.00645-20), 2020-09-08

**a**

**D2**

**Run 1**

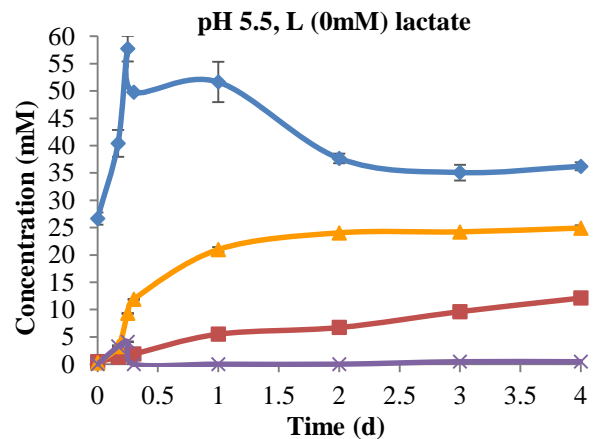

**D2**

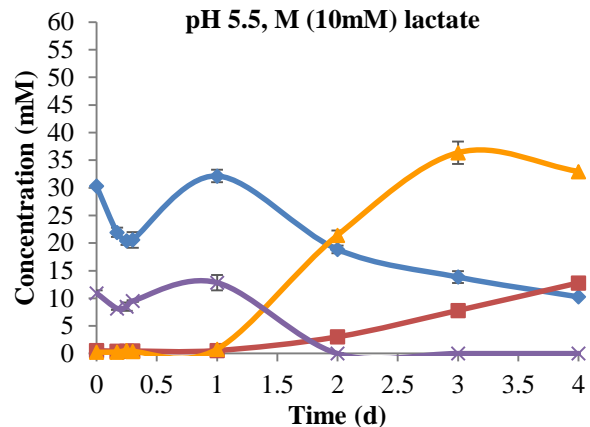

**D2**

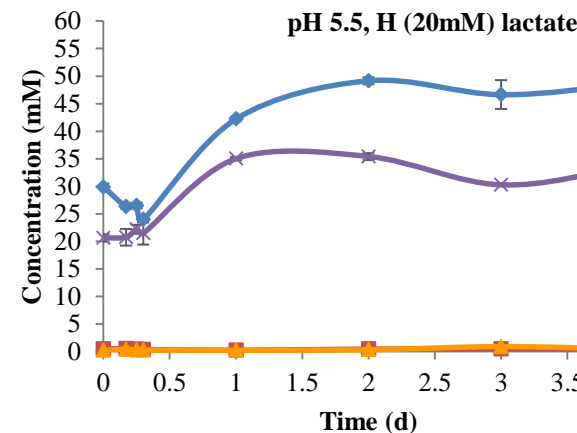

- Acetate
- Propionate
- Butyrate
- Lactate

**Run 2**

(repeat 20mM Lactate)

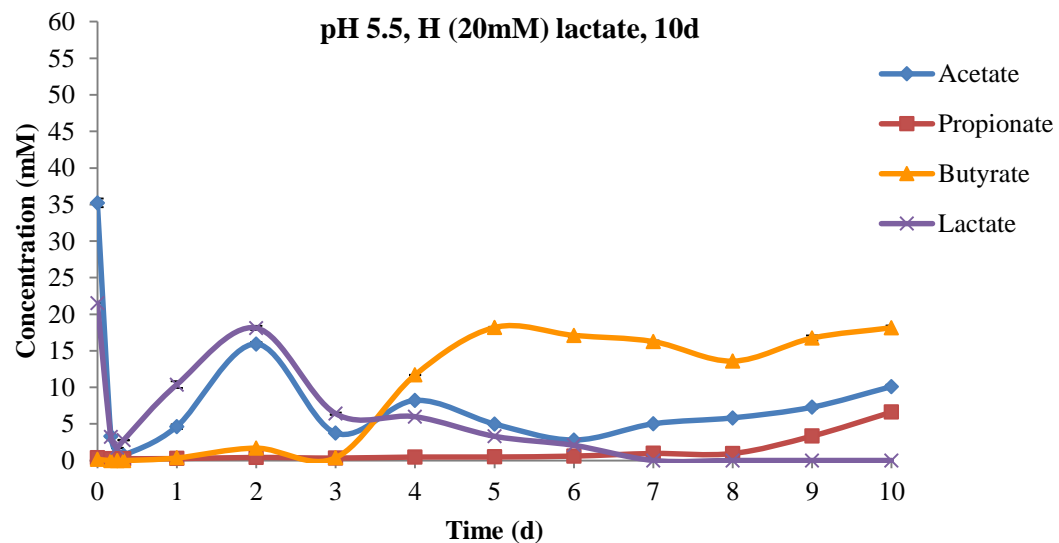

**b****D7****Run 1**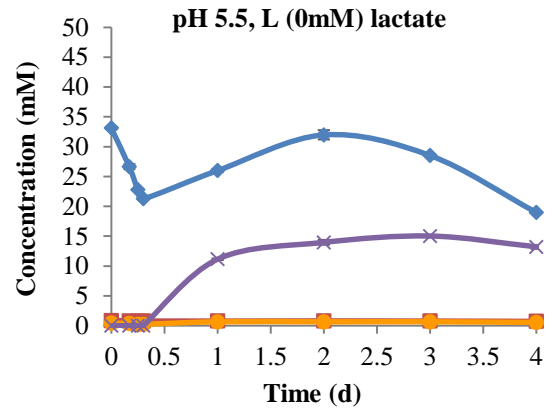**D7**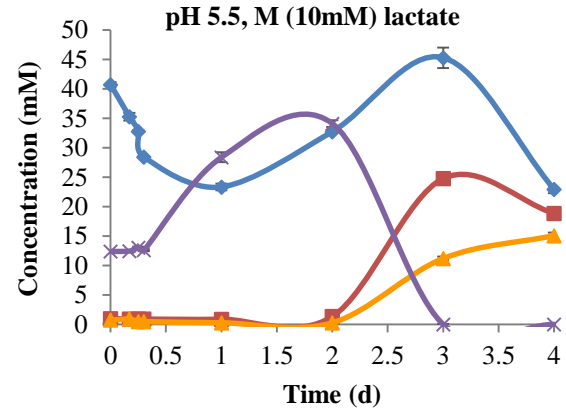**D7**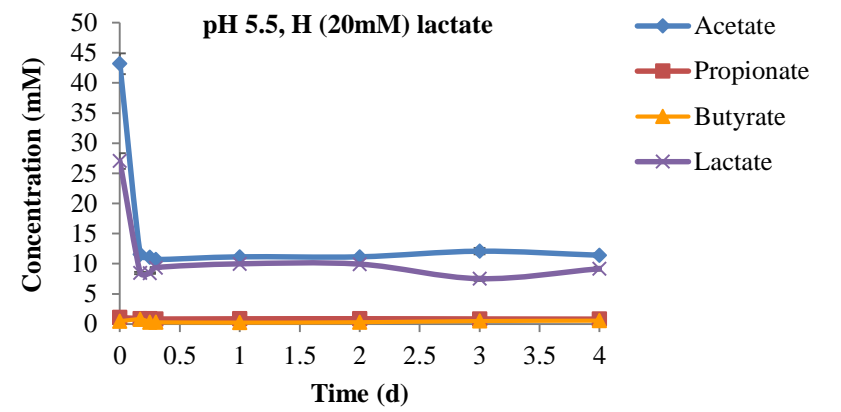**Run 2  
(repeat)**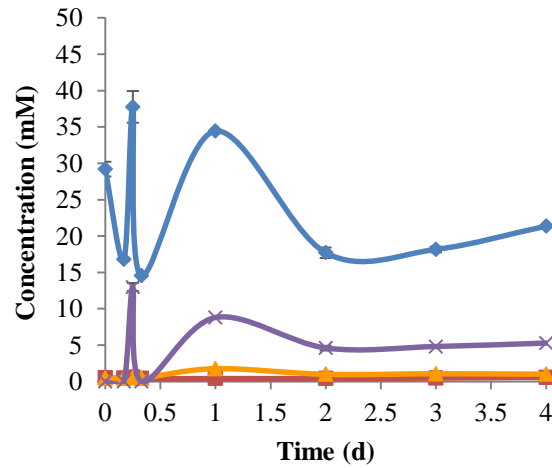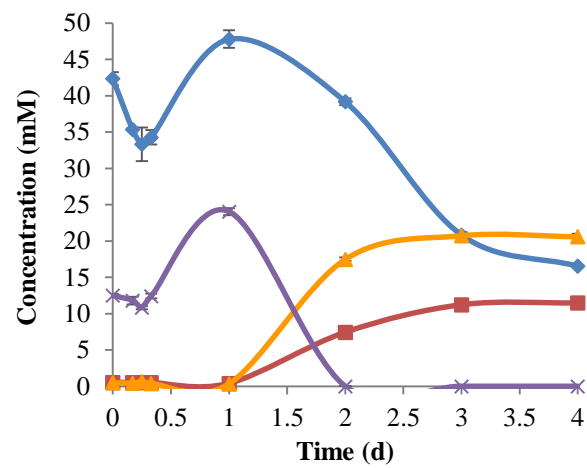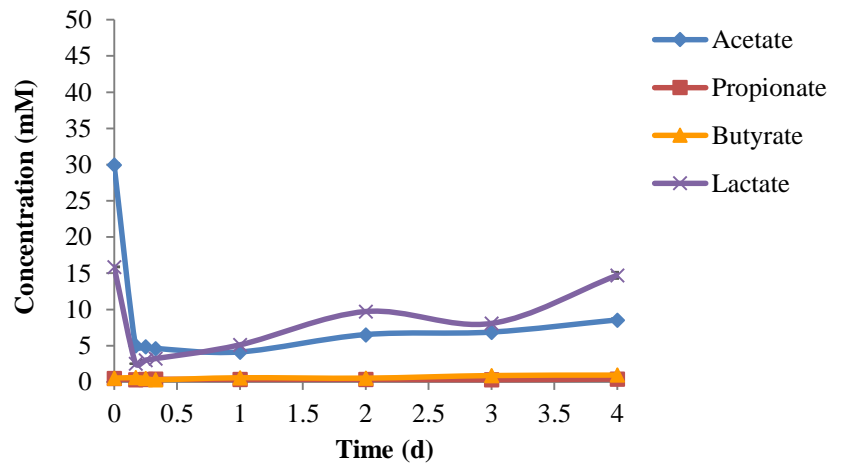

**C****Run 1**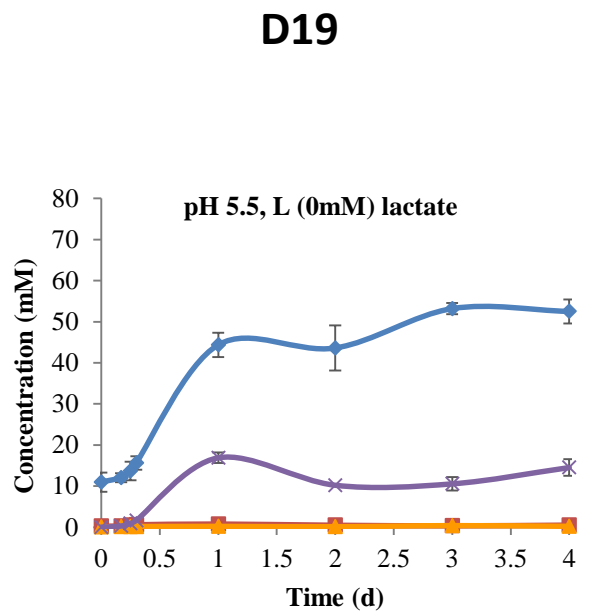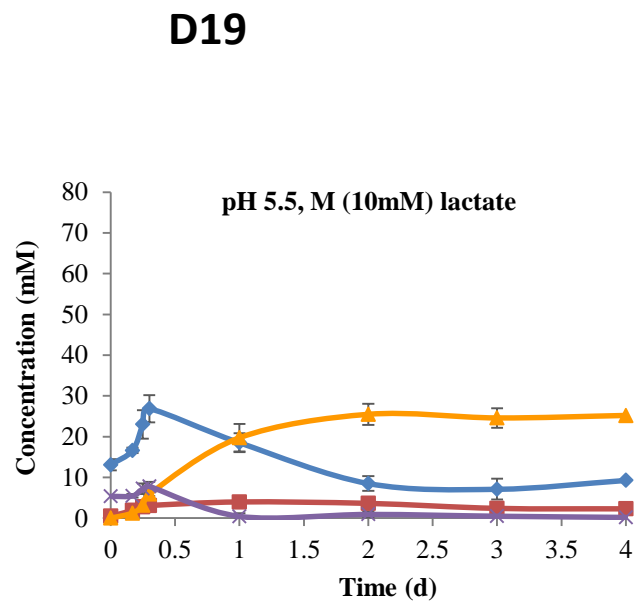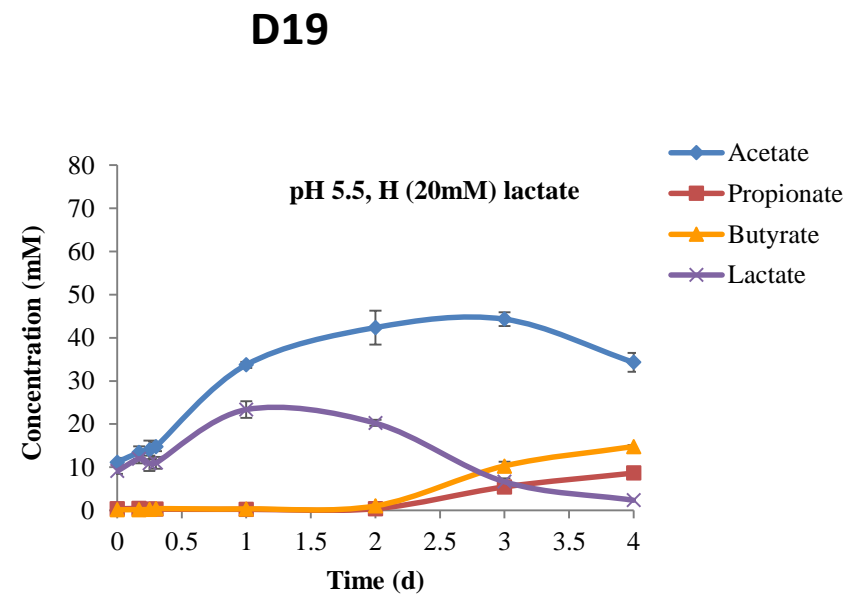**Run 2  
(repeat)**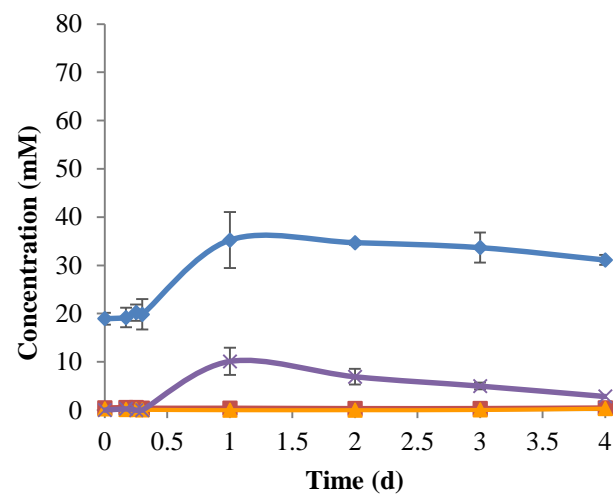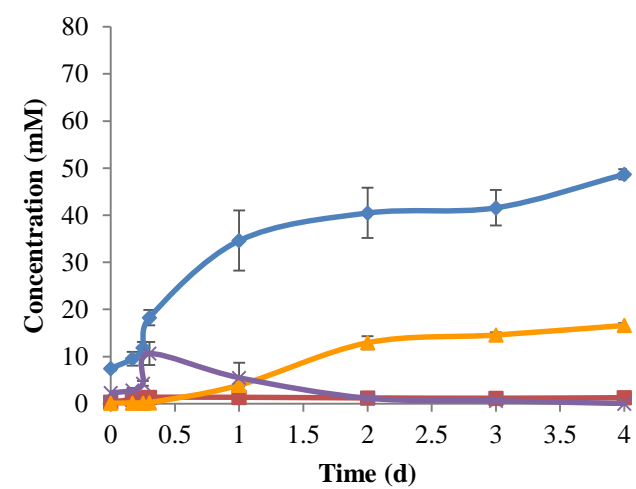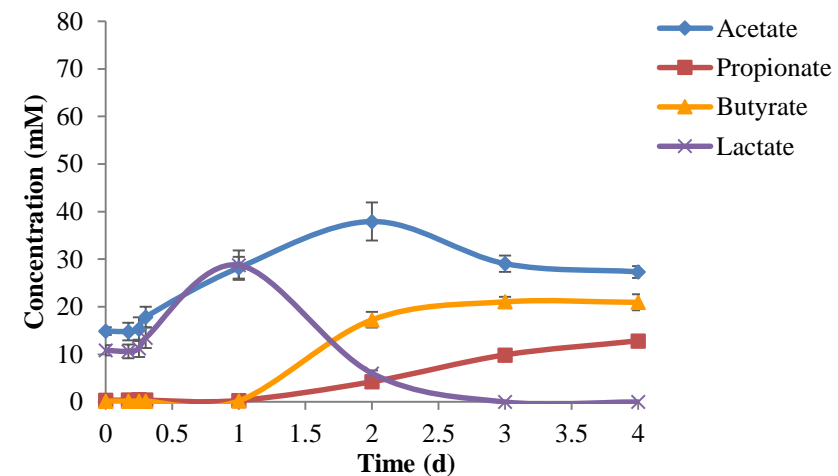

Supplement: mSystems.00645-20-sf003.pdf [file mSystems.00645-20-sf003.pdf]
