# Supplementary material for: Pivotal Roles for pH, Lactate, and Lactate-Utilizing Bacteria in the Stability of a Human Colonic Microbial Ecosystem
Source: PubMed Central journal article supplement (PMC7483512; doi:10.1128/msystems.00645-20), 2020-09-08

**a**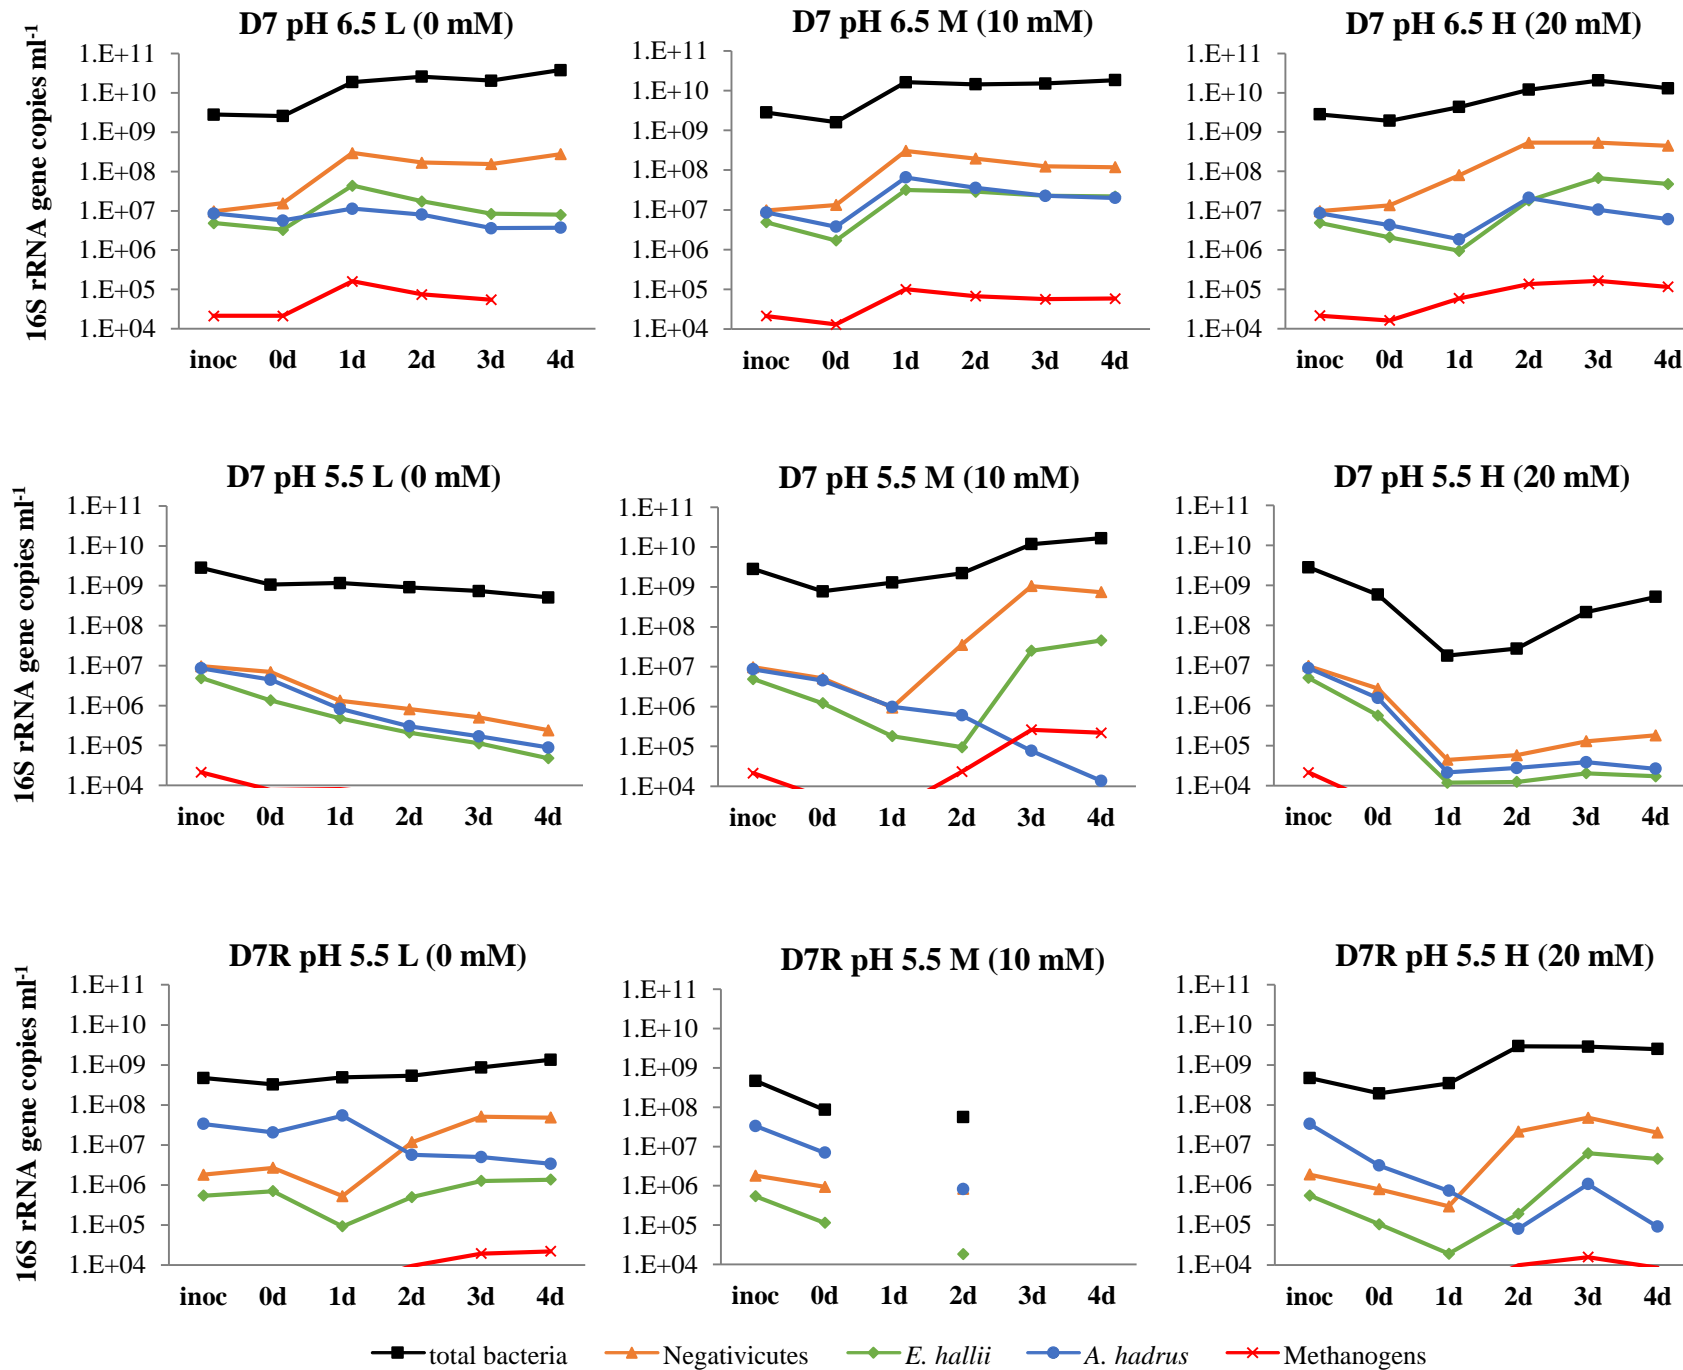

**b**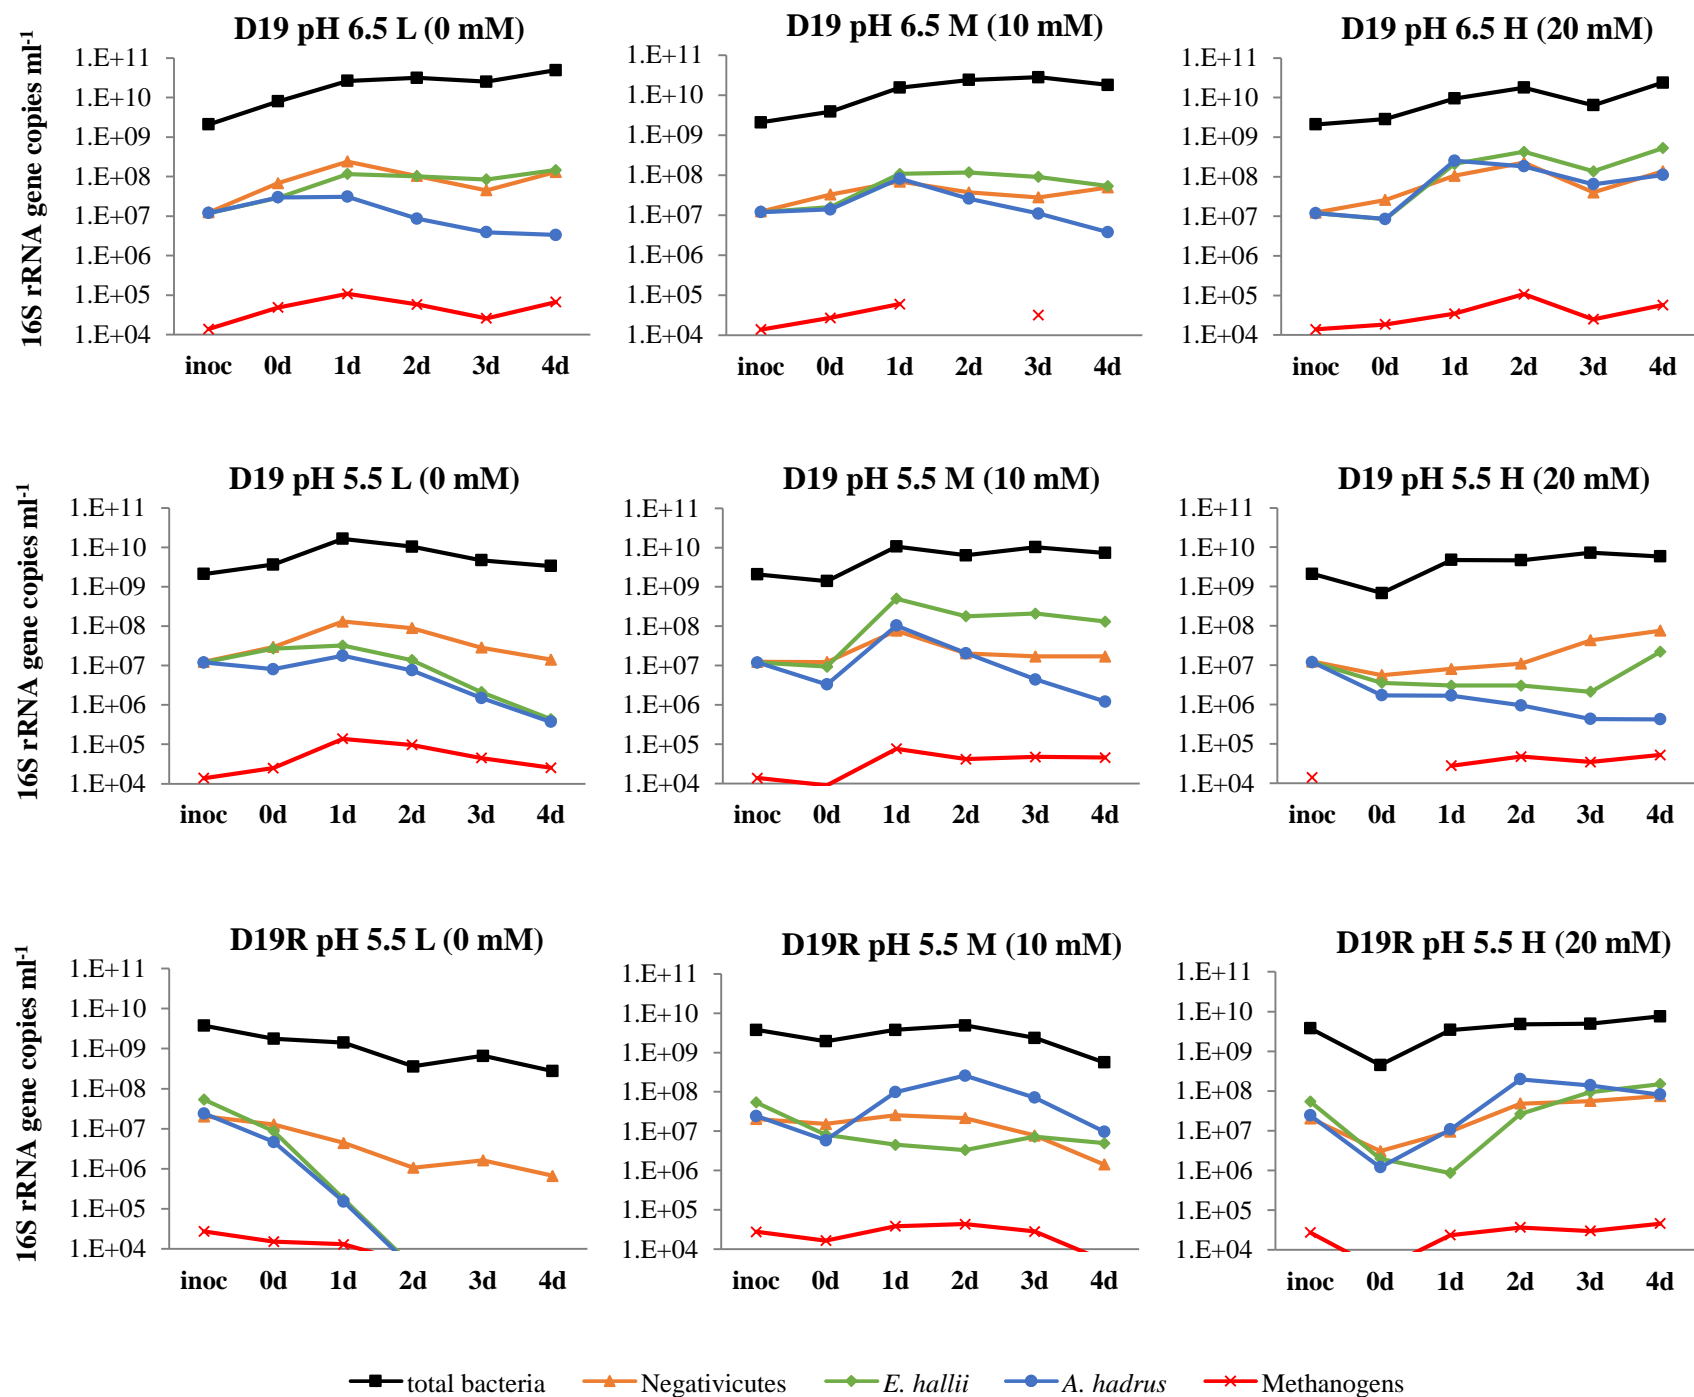

Supplement: mSystems.00645-20-sf004.pdf [file mSystems.00645-20-sf004.pdf]
